# Supplementary material for: Model-based PEEP titration versus standard practice in mechanical ventilation: a randomised controlled trial
Source: Springer Nature journal article supplement (doi:10.1186/s13063-019-4035-7), 2020-02-01
Supplement: MOESM1 [file 17615012]

## CURE screening, and study processes

All patients admitted to Christchurch Hospital ICU undergoing invasion mechanical ventilation

N = \_\_\_\_\_

### Inclusion criteria:

- 1 P/F ratio  $\leq$  200
  - i. on any level of PEEP or FiO<sub>2</sub>, **OR**
  - ii. P/F ratio  $\leq$  200 on FiO<sub>2</sub> = 50% and PEEP = 5

N = \_\_\_\_\_

Lung recruitment manoeuvres considered to be in patient's best interests

Proxy consent

### Allocation of treatment

Model-Based Ventilation (MBV)

N= \_\_\_\_\_

Withdrawn from study

N= \_\_\_\_\_

Withdrawn from study

N= \_\_\_\_\_

Standard Practice Ventilation (SPV)

N= \_\_\_\_\_

### Analysis of results

Primary Outcome: AUC PaO<sub>2</sub>/FiO<sub>2</sub>

Secondary Outcomes: (i) LoMV, (ii) VFD up to 28 days, (iii) ICU and hospital LoS, (iv) AUC of SpO<sub>2</sub> / FiO<sub>2</sub> during MV, (v) Frequency /Fraction of time SpO<sub>2</sub> < 88%, (vi) Changes in respiratory mechanics, (vii) Changes in chest X-ray Index scores, (viii) Rescue therapies: (a) prone positioning, (b) nitric oxide (c) ECMO, (ix) Hospital and 90-day mortality.

Adverse Events:

### Exclusion criteria:

1. P/F ratio > 300 on any level of PEEP or FiO<sub>2</sub>
2. P/F ratio > 200 on FiO<sub>2</sub> = 50% and PEEP = 5
3. Ventilated > 48 hours (including time spent in another hospital)
4. Not expected to be ventilated for another 48 hours
5. < 16 years.
6. Suspicion of raised intracranial pressure (ICP) or ICP  $\geq$  20 mmHg.
7. High spinal cord injury with loss of motor function and/ or significant weakness from any neurological disease.
8. Any barotrauma during this admission.
9. Asthma as the primary presenting condition or significant COPD.
10. Patients who are moribund and/or not expected to survive for > 72 hours.
11. Limitations of treatment, or not expected to survive 90 days
12. Lack of clinical equipoise.
13. Previously enrolled patient

N = \_\_\_\_\_
